# Supplementary material
Source: ML conference proceedings conference paper supplement (https://openreview.net/forum?id=1mOeklnLf4)

VICReg

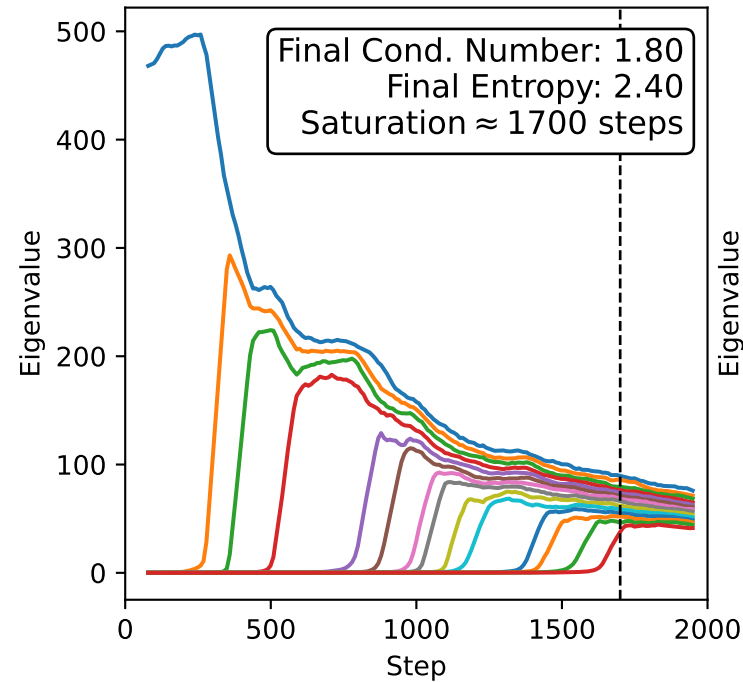

Barlow Twins

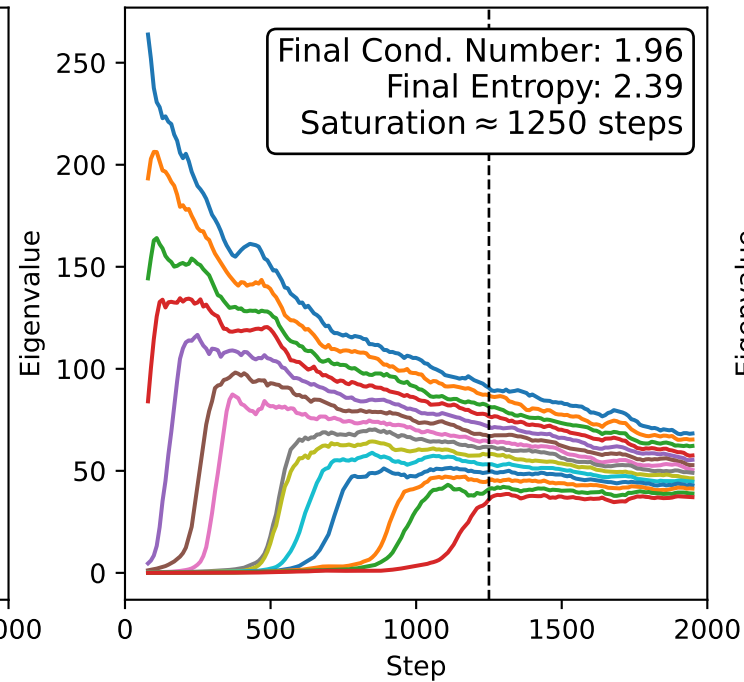

SimCLR

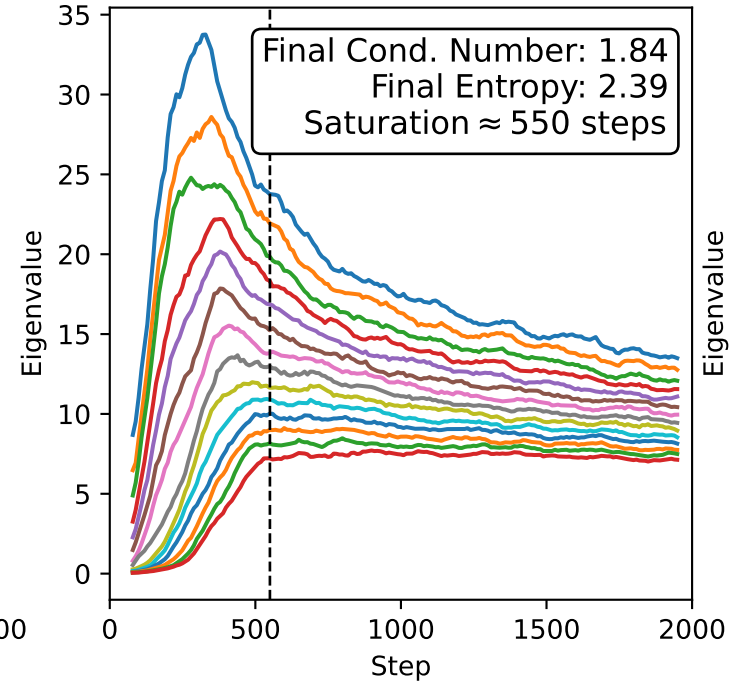

FroSSL

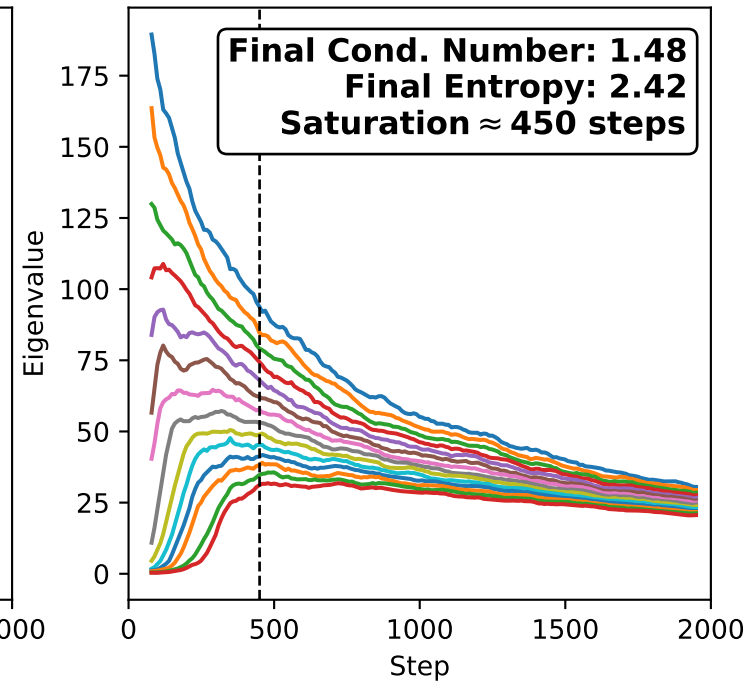

Supplement: supplementary_material [file attachment]

FroSSL Variant

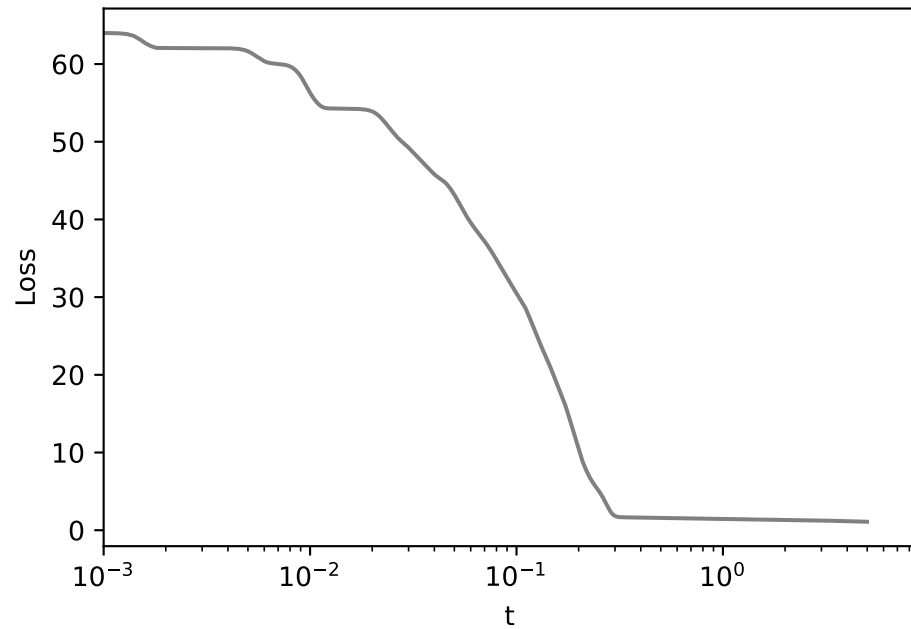

Barlow Twins Variant

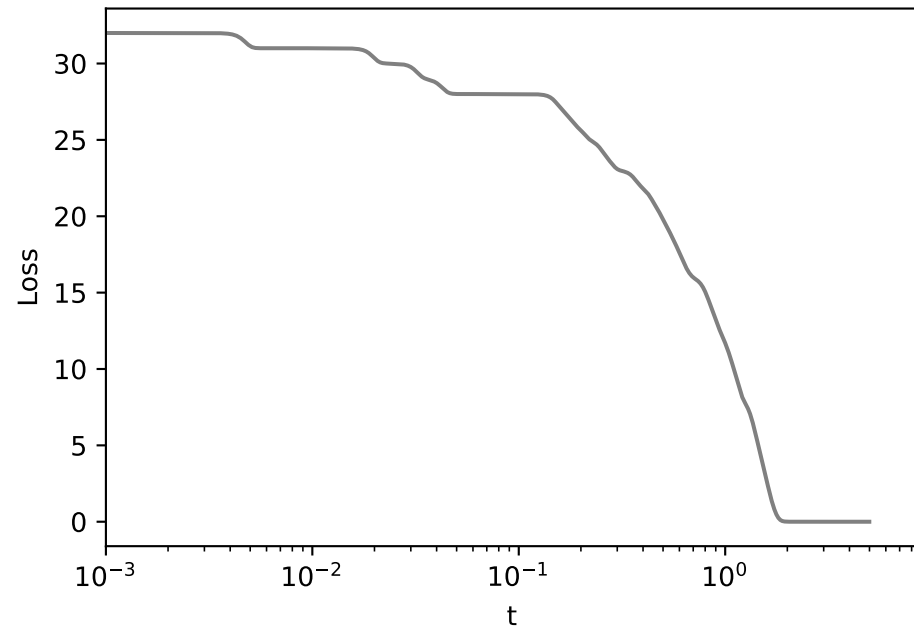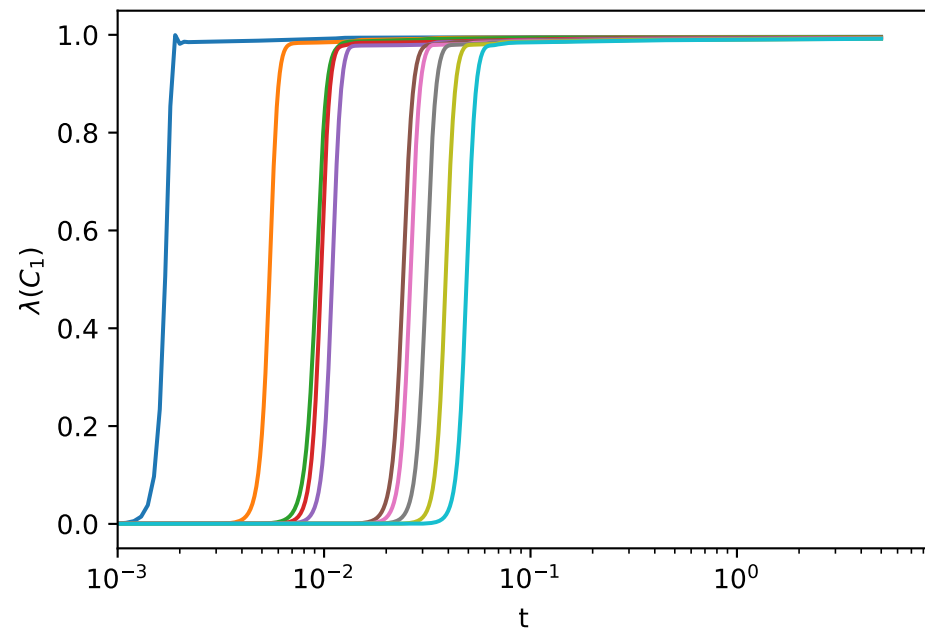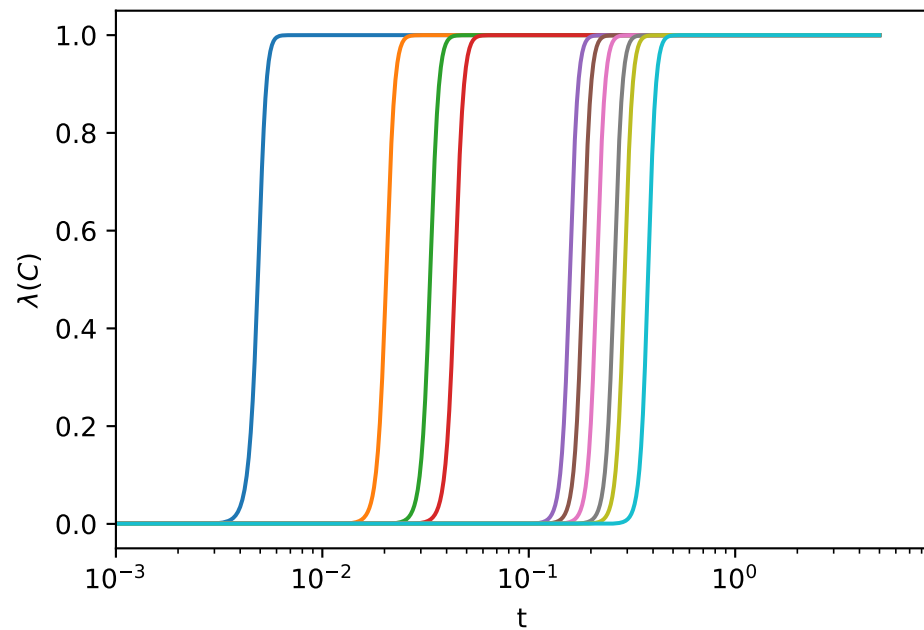

Supplement: supplementary_material [file attachment]
